# Supplementary material for: Real‐World Clinical Effectiveness of Liraglutide 3.0 mg for Weight Management in Canada
Source: PubMed Central journal article supplement — Obesity (Silver Spring). 2019 May 7;27(6):917–24. doi: 10.1002/oby.22462 (PMC6593982; doi:10.1002/oby.22462), 2019-05-07
Supplement: OBY-27-917-s001.pdf [file OBY-27-917-s001.pdf]

Table S1: Variables

| Variable                                           | Values/unit of measurement             | Definition                                                                                                                                                                                                             |
|----------------------------------------------------|----------------------------------------|------------------------------------------------------------------------------------------------------------------------------------------------------------------------------------------------------------------------|
| Age                                                | Years                                  | Directly from data, derived from date of birth                                                                                                                                                                         |
| Sex                                                | Male                                   | Directly from data                                                                                                                                                                                                     |
|                                                    | Female                                 |                                                                                                                                                                                                                        |
|                                                    | Unknown                                |                                                                                                                                                                                                                        |
| Ethnicity                                          | White                                  | Directly from data                                                                                                                                                                                                     |
|                                                    | Aboriginal                             |                                                                                                                                                                                                                        |
|                                                    | African American                       |                                                                                                                                                                                                                        |
|                                                    | African heritage                       |                                                                                                                                                                                                                        |
|                                                    | East Asian                             |                                                                                                                                                                                                                        |
|                                                    | South Asian                            |                                                                                                                                                                                                                        |
|                                                    | West Indie Black                       |                                                                                                                                                                                                                        |
|                                                    | Other                                  |                                                                                                                                                                                                                        |
|                                                    | White/Other                            | Coded from above for adjusted analyses                                                                                                                                                                                 |
| Failure of previous weight management intervention | Yes                                    | Directly from data                                                                                                                                                                                                     |
|                                                    | No                                     |                                                                                                                                                                                                                        |
| Diabetes                                           | No                                     |                                                                                                                                                                                                                        |
|                                                    | Pre-diabetes                           | Pre-diabetes: ever evidence of HbA1c 5.7-6.4% or FBG 6.0 – 7.0;                                                                                                                                                        |
|                                                    | Type 2 diabetes                        | Type 2 diabetes: ever evidence of diabetic drug prescription (ATC code A10) or HbA1c>7%, or two occurrences of fasting glucose >7 mg/dl;                                                                               |
| Dyslipidemia                                       | Yes                                    | Yes: ever evidence of lipid modifying agents (ATC code C10) or low-density lipoprotein $\geq$ 160 mg/dl, or triglycerides $\geq$ 150 mg/dl, or high-density lipoprotein <40 mg/dl for males and <50 mg/dl for females. |
|                                                    | No                                     |                                                                                                                                                                                                                        |
| Hypertension                                       | Yes                                    | Yes: ever evidence of hypertensive drug (ATC codes C02, C03, or C07–09) prescription, or with a systolic blood pressure (SBP) $\geq$ 140 mmHg and/or a diastolic blood pressure (DBP) $\geq$ 90 mmHg.                  |
|                                                    | No                                     |                                                                                                                                                                                                                        |
| Smoking                                            | Current smoker                         | Directly from data                                                                                                                                                                                                     |
|                                                    | Ex-smoker                              |                                                                                                                                                                                                                        |
|                                                    | Non-smoker                             |                                                                                                                                                                                                                        |
| Weight                                             | Kg                                     | Directly from data, closest to index date in 3 months prior                                                                                                                                                            |
| BMI                                                | Kg/m <sup>2</sup>                      | Directly from data, closest to index date in 12 months prior                                                                                                                                                           |
| Glycated haemoglobin (HbA1c)                       | %                                      | Directly from data, closest to index date in 12 months prior                                                                                                                                                           |
| Diastolic Blood Pressure (DBP)                     | mmHg                                   | Directly from data, closest to index date in 12 months prior                                                                                                                                                           |
| Systolic Blood Pressure (SBP)                      | mmHg                                   | Directly from data, closest to index date in 12 months prior                                                                                                                                                           |
| Waist circumference                                | cm                                     | Directly from data, closest to index date in 12 months prior                                                                                                                                                           |
| Hip circumference                                  | cm                                     | Directly from data, closest to index date in 12 months prior                                                                                                                                                           |
| Fasting glucose                                    | mmol/L                                 | Directly from data, closest to index date in 12 months prior                                                                                                                                                           |
| Low-Density Lipoprotein (LDL)                      | mmol/L                                 | Directly from data, closest to index date in 3 months prior                                                                                                                                                            |
| High-Density Lipoprotein (HDL)                     | mmol/L                                 | Directly from data, closest to index date in 12 months prior                                                                                                                                                           |
| Non-HDL                                            | mmol/L                                 | Directly from data, closest to index date in 12 months prior                                                                                                                                                           |
| Fasting total cholesterol                          | mmol/L                                 | Directly from data, closest to index date in 12 months prior                                                                                                                                                           |
| Fasting triglycerides                              | mmol/L                                 | Directly from data, closest to index date in 12 months prior                                                                                                                                                           |
| Adherence to exercise program <sup>†</sup>         | No adherence to physical activity      | Directly from data, visit immediately prior to index                                                                                                                                                                   |
|                                                    | Partial adherence to physical activity |                                                                                                                                                                                                                        |
|                                                    | Full adherence to physical activity    |                                                                                                                                                                                                                        |
| Adherence to diet <sup>†</sup>                     | Never                                  | Visit immediately prior to index -<br>Never: always exceeding caloric deficit                                                                                                                                          |
|                                                    | Sometimes                              | Sometimes: patient reports meeting or being under caloric prescription some of the time but not always                                                                                                                 |
|                                                    | Always                                 | Always: patient reports always meeting or being under the prescribed caloric restriction                                                                                                                               |

<sup>†</sup>Adherence to exercise program and adherence to diet were based on personalized recommendations made by physicians at WMC and were patient-reported during regularly scheduled visits
