# Supplementary material for: Real‐World Clinical Effectiveness of Liraglutide 3.0 mg for Weight Management in Canada
Source: PubMed Central journal article supplement — Obesity (Silver Spring). 2019 May 7;27(6):917–24. doi: 10.1002/oby.22462 (PMC6593982; doi:10.1002/oby.22462), 2019-05-07
Supplement: OBY-27-917-s002.pdf [file OBY-27-917-s002.pdf]

Table S2a: Linear regression results for weight at 6 months,  $\geq 6$ -month

|                        | Co-efficient | SE    | p-value |
|------------------------|--------------|-------|---------|
| Intercept              | 2.613        | 4.128 | 0.528   |
| Baseline weight        | 0.957        | 0.019 | <0.001  |
| Age                    | -0.078       | 0.046 | 0.091   |
| Sex (ref: Male)        | -2.878       | 1.585 | 0.072   |
| Ethnicity (ref: White) | 0.899        | 1.173 | 0.445   |
| Pre-diabetic (ref: no) | 1.922        | 1.259 | 0.129   |
| Diabetic (ref: no)     | 2.142        | 2.81  | 0.447   |
