# Supplementary material for: Real‐World Clinical Effectiveness of Liraglutide 3.0 mg for Weight Management in Canada
Source: PubMed Central journal article supplement — Obesity (Silver Spring). 2019 May 7;27(6):917–24. doi: 10.1002/oby.22462 (PMC6593982; doi:10.1002/oby.22462), 2019-05-07
Supplement: OBY-27-917-s003.pdf [file OBY-27-917-s003.pdf]

**Table S2b: Logistic regression results for  $\geq 5\%$  weight-loss at 6 months,  $\geq 6$  months**

|                               | Odds Ratio Estimate | 95% CI for Odds Ratio | p-value |
|-------------------------------|---------------------|-----------------------|---------|
| <b>Baseline weight</b>        | 0.992               | (0.978, 1.006)        | 0.256   |
| <b>Age</b>                    | 1.040               | (1.005, 1.342)        | <0.050  |
| <b>Sex (ref: Male)</b>        | 0.462               | (0.159, 1.342)        | 0.156   |
| <b>Ethnicity (ref: White)</b> | 0.924               | (0.401, 2.132)        | 0.854   |
| <b>Pre-diabetic (ref: no)</b> | 1.631               | (0.666, 3.994)        | 0.284   |
| <b>Diabetic (ref: no)</b>     | 2.118               | (0.309, 14.531)       | 0.445   |
